# Supplementary material for: Characterization of immune infiltration in sarcomatoid hepatocellular carcinoma
Source: publisher site journal article supplement (doi:10.18632/aging.203076), 2021-06-03
Supplement: Supplementary file [file aging-v13i11-203076-supplementary-material-SD1.pdf]

**SUPPLEMENTARY FIGURE**

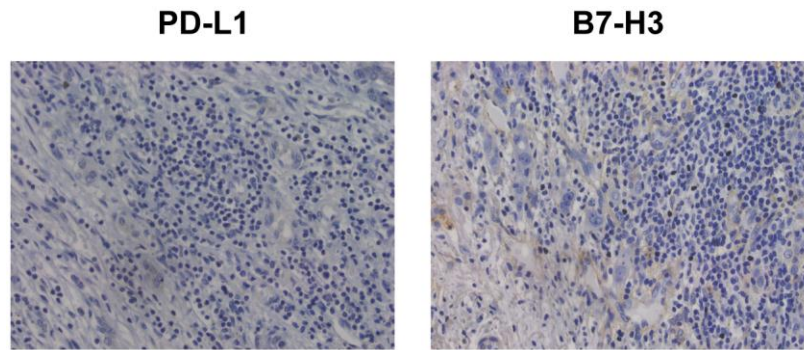

**Supplementary Figure 1. PD-L1 and B7-H3 expression in the stromal cells.**
